# Supplementary material for: Study of SarA by DNA Affinity Capture Assay (DACA) Employing Three Promoters of Key Virulence and Resistance Genes in Methicillin-Resistant Staphylococcus aureus
Source: MDPI journal article supplement (doi:10.3390/antibiotics11121714), 2022-11-28
Supplement: s1 [file s1]

## Supplementary data

**Supplementary Table S1.** Primer sequences used in this study

| Primer name | Sequence (5' → 3')                    |
|-------------|---------------------------------------|
| mecA-F      | Biotin-TCTCACTAAAAAAATTACACATA        |
| mecA-R      | CAATATACTCCTTATATAAGACTAC             |
| sarA-F      | Biotin-ATTAACCTTTTAGCTTATCATTTTAACTTG |
| sarA-R      | GTTTAAAACCTCCCTATTTGAT                |
| sarR-F      | Biotin-TGTCAATGTATGTAGGTTGATAAGAAGAG  |
| sarR-R      | TATTAAACCACTCCTCTGATGCA               |

**Supplementary Table S2.** PCR product sequence

| Upstream region PCR product | Size (bp) | Sequence (5' → 3')                                                                                                                                                                                                                                                                                                                                                                                                                                                                                                                                                                                                                                                                                                                                                                                                                                                                                                                                                                                                                                                  |
|-----------------------------|-----------|---------------------------------------------------------------------------------------------------------------------------------------------------------------------------------------------------------------------------------------------------------------------------------------------------------------------------------------------------------------------------------------------------------------------------------------------------------------------------------------------------------------------------------------------------------------------------------------------------------------------------------------------------------------------------------------------------------------------------------------------------------------------------------------------------------------------------------------------------------------------------------------------------------------------------------------------------------------------------------------------------------------------------------------------------------------------|
| mecA                        | 171       | TCTCACTAAAAAAATTACACATATCGTGAGCAATGAACT<br>GATTATACTTAACATTAAGATGATAACACCTTCTA<br>CACCTCCATATCACAAAAATTATAACATTATTTTGACATA<br>AATACTACATTTGTAATATACTACAAATGTAGTCTTATAT<br>AAGGAGTATATTG                                                                                                                                                                                                                                                                                                                                                                                                                                                                                                                                                                                                                                                                                                                                                                                                                                                                             |
| sarA                        | 947       | ATTAACCTTTAGCTTATCATTTTAACTTGTAATTATTTTAA<br>AAAGTGATAAGCTATTTTTTTGTGGTCTAAAAATCTTTAG<br>AAAAGCGTTGATTTGGGTAGTATGCTTTGACACAACAAA<br>TTTTAATTTAGCAAATTCGATAGTCAACTCATTCTTAAGA<br>CCTAAATTAATGTTATTTTTTAATAATTTACACCAAATTA<br>ATAGCAAAAATTATGTTATTCGTGCTAATATTTTCATAGTT<br>GGTTATTCAATTAATTAAGTCAAAATGCACAAC<br>TTTTTATAATTCATTGAGTCGAGTTTGAAAAATAAAAGTG<br>CTTTAATGCATGATCAATTATCGTACTTTCTATTATTGTT<br>ACCCGTTATCAATCGGAATAACGTATAGACACTTTAACG<br>TGCTATAGATTGGTTTTAATCACTAAATTAATGTGTTTTT<br>CTTATCATTAAGTCACTGAGAAATTACTAAATTAATAA<br>AAATTATAAAAAATTTTTCATTTTATAGTGATAAAATCTGA<br>AAAATGGGTATAAATAGTAGAAGAAGTTAACTTGGAAG<br>AGTTAAGCTATAACAAAGAATCTCTTTAGACACACATTG<br>AATATCGAAACATTTAATTGCGCTAAATCGTTTCATTAAA<br>TAAATTACCTTGTATTGTGCTAATTAAGGTAAATTAT<br>AAAAAATGCTGATATTTTGTACTAAACCAAATGCTAACC<br>CAGAAATACAATCACTGTGTCTAATGAATAATTTGTTTTA<br>TAAACACTTTTTTGTCTTCTCATTTTAAATTAGTTATA<br>ATTAACATAATAAGAGCATTAAATATATTTAATAAAAA<br>CTTATTTAATGCAAAATTATGACTAACATATCTATAATAA<br>ATAAAGATTAGATATCAATATATTATCGGGCAAATGTAT<br>CGAGCAAGATGCATCAAAATAGGGAGGTTTTAAAC |
| sarR                        | 427       | TGTCAATGTATGTAGGTTGATAAGAAGAGTTTGAATGAT<br>AACTCATTCATTTAAAGATAAATGGCATGCGTTATGAT<br>TTAAAGCTCTTCTTTTTTATATTTTATAAATTTGTGAGC<br>AAGCCATCCAATTAATATAAAAAATATCAAATCAAACAC<br>GTTGATATAGATTAAAATTTTAAAGTTTACATATCAGTT<br>AAGATACAAAATATTCAGACTAATAATTTTCAATTTGGC<br>AAAATATCTTAAACATCAAATTATTATAAGAAATAAATG<br>TATTTAACCATATTCTAGTAATAAAAAATATTGAATTTTAA<br>TACTTATTTGTTTAGAATGAACTTTATAACATAGTTGGAT<br>AGAGTTTCGATTTAATAAATTACATGTGAACCTTGCTACA<br>ACAAGATGTGCATCAGAGGAGTGTTTAAATA                                                                                                                                                                                                                                                                                                                                                                                                                                                                                                                                                                                    |

**Supplementary Table S3.** LC-MS/MS results of three promoters

***mecA* promoter**

| Accession  | Description                                                                                                                                                             |
|------------|-------------------------------------------------------------------------------------------------------------------------------------------------------------------------|
| Q2FZK7     | Bifunctional autolysin OS=Staphylococcus aureus (strain NCTC 8325 / PS 47) OX=93061 GN=atl PE=1 SV=1 UPId=UP000008816 PPId=UP000008816                                  |
| Q2G2U9     | Transcriptional regulator SarA OS=Staphylococcus aureus (strain NCTC 8325 / PS 47) OX=93061 GN=sarA PE=1 SV=3 UPId=UP000008816 PPId=UP000008816                         |
| Q2FZS8     | Chaperone protein ClpB OS=Staphylococcus aureus (strain NCTC 8325 / PS 47) OX=93061 GN=clpB PE=3 SV=1 UPId=UP000008816 PPId=UP000008816                                 |
| Q2FZ27     | GTP-sensing transcriptional pleiotropic repressor CodY OS=Staphylococcus aureus (strain NCTC 8325 / PS 47) OX=93061 GN=codY PE=1 SV=1 UPId=UP000008816 PPId=UP000008816 |
| A0A380DJ06 | Acid phosphatase OS=Staphylococcus aureus OX=1280 GN=hel PE=4 SV=1 UPId=UP000255091 PPId=UP000008816                                                                    |
| Q2FXS8     | 50S ribosomal protein L21 OS=Staphylococcus aureus (strain NCTC 8325 / PS 47) OX=93061 GN=rplU PE=1 SV=1 UPId=UP000008816 PPId=UP000008816                              |
| Q2FWW1     | MHC class II analog protein OS=Staphylococcus aureus (strain NCTC 8325 / PS 47) OX=93061 GN=SAOUHSC_02161 PE=4 SV=1 UPId=UP000008816 PPId=UP000008816                   |
| Q2FXM9     | Pyruvate kinase OS=Staphylococcus aureus (strain NCTC 8325 / PS 47) OX=93061 GN=pyk PE=3 SV=1 UPId=UP000008816 PPId=UP000008816                                         |
| Q2FWE8     | ATP synthase subunit alpha OS=Staphylococcus aureus (strain NCTC 8325 / PS 47) OX=93061 GN=atpA PE=3 SV=1 UPId=UP000008816 PPId=UP000008816                             |
| Q9F0R1     | HTH-type transcriptional regulator SarR OS=Staphylococcus aureus (strain NCTC 8325 / PS 47) OX=93061 GN=sarR PE=1 SV=3 UPId=UP000008816 PPId=UP000008816                |
| A0A380DJX5 | Ribose-phosphate pyrophosphokinase OS=Staphylococcus aureus OX=1280 GN=prs PE=3 SV=1 UPId=UP000255091 PPId=UP000008816                                                  |
| Q2G2D0     | Translation initiation factor IF-2 OS=Staphylococcus aureus (strain NCTC 8325 / PS 47) OX=93061 GN=infB PE=3 SV=1 UPId=UP000008816 PPId=UP000008816                     |
| A0A6B8R4W3 | DNA-directed RNA polymerase subunit beta OS=Staphylococcus aureus OX=1280 GN=rpoB PE=3 SV=1 UPId=UP000425526 PPId=UP000008816                                           |
| Q2G055     | Ribosome hibernation promotion factor OS=Staphylococcus aureus (strain NCTC 8325 / PS 47) OX=93061 GN=hpf PE=1 SV=1 UPId=UP000008816 PPId=UP000008816                   |
| Q2FW39     | 30S ribosomal protein S9 OS=Staphylococcus aureus (strain NCTC 8325 / PS 47) OX=93061 GN=rpsI PE=1 SV=1 UPId=UP000008816 PPId=UP000008816                               |
| D4FNL7     | Ribonuclease R OS=Staphylococcus epidermidis M23864:W2(grey) OX=525375 GN=rnr PE=3 SV=1 UPId=UP000004733 PPId=UP000008816                                               |
| A0A380EL47 | IDP OS=Staphylococcus aureus OX=1280 GN=citC_1 PE=3 SV=1 UPId=UP000254116 PPId=UP000008816                                                                              |
| Q2G0P5     | ATP-dependent Clp protease ATP-binding subunit ClpC OS=Staphylococcus aureus (strain                                                                                    |

|            |                                                                                                                                                             |
|------------|-------------------------------------------------------------------------------------------------------------------------------------------------------------|
|            | NCTC 8325 / PS 47) OX=93061 GN=clpC PE=1 SV=1 UPId=UP000008816 PPId=UP000008816                                                                             |
| Q2FZB8     | Fibrinogen-binding protein OS=Staphylococcus aureus (strain NCTC 8325 / PS 47) OX=93061 GN=SAOUHSC_01114 PE=4 SV=1 UPId=UP000008816 PPId=UP000008816        |
| A0A3S0KKL9 | Translation initiation factor IF-3 OS=Staphylococcus pasteurii OX=45972 GN=infC PE=3 SV=1 UPId=UP000273693 PPId=UP000008816                                 |
| Q2G155     | Lipase 2 OS=Staphylococcus aureus (strain NCTC 8325 / PS 47) OX=93061 GN=lip2 PE=1 SV=1 UPId=UP000008816 PPId=UP000008816                                   |
| A0A1D4UZD1 | NADH dehydrogenase OS=Staphylococcus aureus OX=1280 GN=ndh PE=4 SV=1 UPId=UP000249913 PPId=UP000008816                                                      |
| A0A2X2KBR6 | Iron(III) dicitrate-binding protein OS=Staphylococcus aureus OX=1280 GN=yhfQ_2 PE=4 SV=1 UPId=UP000249913 PPId=UP000008816                                  |
| Q2FZC7     | Succinate dehydrogenase (quinone) OS=Staphylococcus aureus (strain NCTC 8325 / PS 47) OX=93061 GN=SAOUHSC_01105 PE=3 SV=1 UPId=UP000008816 PPId=UP000008816 |

#### **sarA promoter**

| Accession | Description                                                                                                                                                                                              |
|-----------|----------------------------------------------------------------------------------------------------------------------------------------------------------------------------------------------------------|
| Q2FXM9    | Pyruvate kinase OS=Staphylococcus aureus (strain NCTC 8325 / PS 47) OX=93061 GN=pyk PE=3 SV=1 UPId=UP000008816 PPId=UP000008816                                                                          |
| Q2G0N0    | Elongation factor Tu OS=Staphylococcus aureus (strain NCTC 8325 / PS 47) OX=93061 GN=tuf PE=3 SV=1 UPId=UP000008816 PPId=UP000008816                                                                     |
| Q2FYS9    | Aconitate hydratase OS=Staphylococcus aureus (strain NCTC 8325 / PS 47) OX=93061 GN=SAOUHSC_01347 PE=3 SV=1 UPId=UP000008816 PPId=UP000008816                                                            |
| Q2G2U9    | Transcriptional regulator SarA OS=Staphylococcus aureus (strain NCTC 8325 / PS 47) OX=93061 GN=sarA PE=1 SV=3 UPId=UP000008816 PPId=UP000008816                                                          |
| Q2FZ89    | Cell division protein FtsZ OS=Staphylococcus aureus (strain NCTC 8325 / PS 47) OX=93061 GN=ftsZ PE=1 SV=1 UPId=UP000008816 PPId=UP000008816                                                              |
| Q2FZK7    | Bifunctional autolysin OS=Staphylococcus aureus (strain NCTC 8325 / PS 47) OX=93061 GN=atl PE=1 SV=1 UPId=UP000008816 PPId=UP000008816                                                                   |
| Q2G296    | Formate--tetrahydrofolate ligase OS=Staphylococcus aureus (strain NCTC 8325 / PS 47) OX=93061 GN=fhs PE=3 SV=1 UPId=UP000008816 PPId=UP000008816                                                         |
| Q2FZS8    | Chaperone protein ClpB OS=Staphylococcus aureus (strain NCTC 8325 / PS 47) OX=93061 GN=clpB PE=3 SV=1 UPId=UP000008816 PPId=UP000008816                                                                  |
| Q2FYM1    | 2-oxoglutarate dehydrogenase E1 component OS=Staphylococcus aureus (strain NCTC 8325 / PS 47) OX=93061 GN=odhA PE=3 SV=1 UPId=UP000008816 PPId=UP000008816                                               |
| Q2G2A4    | Dihydrolipoamide acetyltransferase component of pyruvate dehydrogenase complex OS=Staphylococcus aureus (strain NCTC 8325 / PS 47) OX=93061 GN=SAOUHSC_01042 PE=3 SV=1 UPId=UP000008816 PPId=UP000008816 |
| Q2FYF1    | Elastin-binding protein EbpS OS=Staphylococcus aureus (strain NCTC 8325 / PS 47) OX=93061 GN=ebpS PE=1 SV=1 UPId=UP000008816 PPId=UP000008816                                                            |

|            |                                                                                                                                                                    |
|------------|--------------------------------------------------------------------------------------------------------------------------------------------------------------------|
| O07325     | Cell division protein FtsA OS=Staphylococcus aureus (strain NCTC 8325 / PS 47) OX=93061 GN=ftsA PE=1 SV=2 UPId=UP000008816 PPId=UP000008816                        |
| Q2G0N1     | Elongation factor G OS=Staphylococcus aureus (strain NCTC 8325 / PS 47) OX=93061 GN=fusA PE=1 SV=3 UPId=UP000008816 PPId=UP000008816                               |
| Q2G032     | Glyceraldehyde-3-phosphate dehydrogenase OS=Staphylococcus aureus (strain NCTC 8325 / PS 47) OX=93061 GN=SAOUHSC_00795 PE=3 SV=1 UPId=UP000008816 PPId=UP000008816 |
| Q2FYU7     | Catalase OS=Staphylococcus aureus (strain NCTC 8325 / PS 47) OX=93061 GN=katA PE=2 SV=2 UPId=UP000008816 PPId=UP000008816                                          |
| Q2G0Y7     | Inosine-5'-monophosphate dehydrogenase OS=Staphylococcus aureus (strain NCTC 8325 / PS 47) OX=93061 GN=guaB PE=3 SV=1 UPId=UP000008816 PPId=UP000008816            |
| Q2G111     | Formate dehydrogenase OS=Staphylococcus aureus (strain NCTC 8325 / PS 47) OX=93061 GN=SAOUHSC_00142 PE=3 SV=1 UPId=UP000008816 PPId=UP000008816                    |
| Q2FZJ6     | Bifunctional protein Fld OS=Staphylococcus aureus (strain NCTC 8325 / PS 47) OX=93061 GN=fld PE=3 SV=1 UPId=UP000008816 PPId=UP000008816                           |
| Q2FV67     | 1-pyrroline-5-carboxylate dehydrogenase OS=Staphylococcus aureus (strain NCTC 8325 / PS 47) OX=93061 GN=rocA PE=3 SV=1 UPId=UP000008816 PPId=UP000008816           |
| A0A380EHA8 | Phosphopyruvate hydratase OS=Staphylococcus aureus OX=1280 GN=eno_1 PE=3 SV=1 UPId=UP000254116 PPId=UP000008816                                                    |
| Q2FW66     | Alkaline shock protein 23 OS=Staphylococcus aureus (strain NCTC 8325 / PS 47) OX=93061 GN=asp23 PE=3 SV=1 UPId=UP000008816 PPId=UP000008816                        |
| Q2G245     | Uncharacterized protein OS=Staphylococcus aureus (strain NCTC 8325 / PS 47) OX=93061 GN=SAOUHSC_01854 PE=4 SV=1 UPId=UP000008816 PPId=UP000008816                  |
| A0A2T4Q223 | DNA starvation/stationary phase protection protein OS=Staphylococcus warneri OX=1292 GN=BU085_03840 PE=3 SV=1 UPId=UP000240717 PPId=UP000008816                    |
| Q2FXZ2     | Chaperone protein DnaK OS=Staphylococcus aureus (strain NCTC 8325 / PS 47) OX=93061 GN=dnaK PE=3 SV=1 UPId=UP000008816 PPId=UP000008816                            |
| A0A2X2M7W6 | ABC transporter substrate-binding protein OS=Staphylococcus aureus OX=1280 GN=psaA_2 PE=3 SV=1 UPId=UP000249913 PPId=UP000008816                                   |
| Q2FYF9     | 30S ribosomal protein S1 OS=Staphylococcus aureus (strain NCTC 8325 / PS 47) OX=93061 GN=SAOUHSC_01493 PE=3 SV=1 UPId=UP000008816 PPId=UP000008816                 |
| Q2FXK6     | 30S ribosomal protein S4 OS=Staphylococcus aureus (strain NCTC 8325 / PS 47) OX=93061 GN=rpsD PE=1 SV=1 UPId=UP000008816 PPId=UP000008816                          |
| Q2G0Q8     | Cysteine synthase OS=Staphylococcus aureus (strain NCTC 8325 / PS 47) OX=93061 GN=SAOUHSC_00488 PE=3 SV=1 UPId=UP000008816 PPId=UP000008816                        |
| Q2G1J0     | Putative aldehyde dehydrogenase AldA OS=Staphylococcus aureus (strain NCTC 8325 / PS 47) OX=93061 GN=aldA PE=3 SV=1 UPId=UP000008816 PPId=UP000008816              |
| Q2FWB9     | Deoxyribose-phosphate aldolase OS=Staphylococcus aureus (strain NCTC 8325 / PS 47) OX=93061 GN=deoC PE=3 SV=1 UPId=UP000008816 PPId=UP000008816                    |

|            |                                                                                                                                                                          |
|------------|--------------------------------------------------------------------------------------------------------------------------------------------------------------------------|
| Q2FW11     | 50S ribosomal protein L22 OS=Staphylococcus aureus (strain NCTC 8325 / PS 47) OX=93061 GN=rpIV PE=1 SV=1 UPId=UP000008816 PPId=UP000008816                               |
| A0A6H3XPG2 | L-lactate dehydrogenase OS=Staphylococcus aureus OX=1280 GN=ldh2_1 PE=4 SV=1 UPId=UP000443692 PPId=UP000008816                                                           |
| Q2G0P5     | ATP-dependent Clp protease ATP-binding subunit ClpC OS=Staphylococcus aureus (strain NCTC 8325 / PS 47) OX=93061 GN=clpC PE=1 SV=1 UPId=UP000008816 PPId=UP000008816     |
| Q2FV86     | Pyruvate oxidase, putative OS=Staphylococcus aureus (strain NCTC 8325 / PS 47) OX=93061 GN=SAOUHSC_02849 PE=3 SV=1 UPId=UP000008816 PPId=UP000008816                     |
| Q2FWE0     | Peptide chain release factor 1 OS=Staphylococcus aureus (strain NCTC 8325 / PS 47) OX=93061 GN=prfA PE=3 SV=1 UPId=UP000008816 PPId=UP000008816                          |
| Q2FZ92     | UDP-N-acetylmuramoylalanine--D-glutamate ligase OS=Staphylococcus aureus (strain NCTC 8325 / PS 47) OX=93061 GN=murD PE=3 SV=1 UPId=UP000008816 PPId=UP000008816         |
| Q2FZH5     | Phosphoenolpyruvate-protein phosphotransferase OS=Staphylococcus aureus (strain NCTC 8325 / PS 47) OX=93061 GN=SAOUHSC_01029 PE=3 SV=1 UPId=UP000008816 PPId=UP000008816 |
| Q2G0B5     | Uncharacterized protein OS=Staphylococcus aureus (strain NCTC 8325 / PS 47) OX=93061 GN=SAOUHSC_00690 PE=4 SV=1 UPId=UP000008816 PPId=UP000008816                        |
| A0A4U0CRW2 | MSCRAMM family adhesin clumping factor ClfA (Fragment) OS=Staphylococcus aureus subsp. aureus OX=46170 GN=clfA PE=4 SV=1 UPId=UP000306447 PPId=UP000008816               |
| Q2G170     | 5'-nucleotidase, lipoprotein e(P4) family OS=Staphylococcus aureus (strain NCTC 8325 / PS 47) OX=93061 GN=SAOUHSC_00284 PE=4 SV=1 UPId=UP000008816 PPId=UP000008816      |
| Q2G0N5     | DNA-directed RNA polymerase subunit beta' OS=Staphylococcus aureus (strain NCTC 8325 / PS 47) OX=93061 GN=rpoC PE=3 SV=2 UPId=UP000008816 PPId=UP000008816               |
| Q2FZ82     | Isoleucine--tRNA ligase OS=Staphylococcus aureus (strain NCTC 8325 / PS 47) OX=93061 GN=ileS PE=3 SV=1 UPId=UP000008816 PPId=UP000008816                                 |
| Q2G041     | Thioredoxin reductase OS=Staphylococcus aureus (strain NCTC 8325 / PS 47) OX=93061 GN=SAOUHSC_00785 PE=3 SV=1 UPId=UP000008816 PPId=UP000008816                          |
| Q2FVT8     | Uncharacterized protein OS=Staphylococcus aureus (strain NCTC 8325 / PS 47) OX=93061 GN=SAOUHSC_02604 PE=4 SV=1 UPId=UP000008816 PPId=UP000008816                        |
| Q2FWN4     | 60 kDa chaperonin OS=Staphylococcus aureus (strain NCTC 8325 / PS 47) OX=93061 GN=groL PE=3 SV=1 UPId=UP000008816 PPId=UP000008816                                       |
| Q2G019     | DUF5067 domain-containing protein OS=Staphylococcus aureus (strain NCTC 8325 / PS 47) OX=93061 GN=SAOUHSC_00808 PE=1 SV=1 UPId=UP000008816 PPId=UP000008816              |
| Q2FXP7     | Threonine--tRNA ligase OS=Staphylococcus aureus (strain NCTC 8325 / PS 47) OX=93061 GN=thrS PE=3 SV=1 UPId=UP000008816 PPId=UP000008816                                  |
| Q2FZL5     | 1,4-dihydroxy-2-naphthoyl-CoA synthase OS=Staphylococcus aureus (strain NCTC 8325 / PS 47) OX=93061 GN=menB PE=3 SV=1 UPId=UP000008816 PPId=UP000008816                  |

|            |                                                                                                                                                                                                                       |
|------------|-----------------------------------------------------------------------------------------------------------------------------------------------------------------------------------------------------------------------|
| Q2FWD6     | Putative aldehyde dehydrogenase OS=Staphylococcus aureus (strain NCTC 8325 / PS 47) OX=93061 GN=SAOUHSC_02363 PE=3 SV=1 UPId=UP000008816 PPId=UP000008816                                                             |
| Q2FZ83     | Uncharacterized protein OS=Staphylococcus aureus (strain NCTC 8325 / PS 47) OX=93061 GN=SAOUHSC_01158 PE=4 SV=1 UPId=UP000008816 PPId=UP000008816                                                                     |
| P47768     | DNA-directed RNA polymerase subunit beta OS=Staphylococcus aureus (strain NCTC 8325 / PS 47) OX=93061 GN=rpoB PE=3 SV=2 UPId=UP000008816 PPId=UP000008816                                                             |
| Q2G2D7     | PKS_ER domain-containing protein OS=Staphylococcus aureus (strain NCTC 8325 / PS 47) OX=93061 GN=SAOUHSC_02447 PE=4 SV=1 UPId=UP000008816 PPId=UP000008816                                                            |
| Q2G224     | Deoxyribose-phosphate aldolase OS=Staphylococcus aureus (strain NCTC 8325 / PS 47) OX=93061 GN=deoC PE=3 SV=1 UPId=UP000008816 PPId=UP000008816                                                                       |
| A0A2X2K781 | Short-chain alcohol dehydrogenase OS=Staphylococcus aureus OX=1280 GN=NCTC7878_03552 PE=4 SV=1 UPId=UP000249913 PPId=UP000008816                                                                                      |
| Q2FW20     | 30S ribosomal protein S8 OS=Staphylococcus aureus (strain NCTC 8325 / PS 47) OX=93061 GN=rpsH PE=1 SV=1 UPId=UP000008816 PPId=UP000008816                                                                             |
| Q2G1P6     | M20_dimer domain-containing protein OS=Staphylococcus aureus (strain NCTC 8325 / PS 47) OX=93061 GN=SAOUHSC_00057 PE=4 SV=1 UPId=UP000008816 PPId=UP000008816                                                         |
| Q2FY66     | Glucose-6-phosphate 1-dehydrogenase OS=Staphylococcus aureus (strain NCTC 8325 / PS 47) OX=93061 GN=zwf PE=3 SV=1 UPId=UP000008816 PPId=UP000008816                                                                   |
| Q2G2A5     | Pyruvate dehydrogenase complex, E1 component, pyruvate dehydrogenase beta subunit, putative OS=Staphylococcus aureus (strain NCTC 8325 / PS 47) OX=93061 GN=SAOUHSC_01041 PE=4 SV=1 UPId=UP000008816 PPId=UP000008816 |
| Q2FXV9     | Alanine--tRNA ligase OS=Staphylococcus aureus (strain NCTC 8325 / PS 47) OX=93061 GN=alaS PE=3 SV=1 UPId=UP000008816 PPId=UP000008816                                                                                 |
| Q2FW12     | 30S ribosomal protein S3 OS=Staphylococcus aureus (strain NCTC 8325 / PS 47) OX=93061 GN=rpsC PE=1 SV=1 UPId=UP000008816 PPId=UP000008816                                                                             |
| Q2FXE8     | Uncharacterized protein OS=Staphylococcus aureus (strain NCTC 8325 / PS 47) OX=93061 GN=SAOUHSC_01901 PE=4 SV=1 UPId=UP000008816 PPId=UP000008816                                                                     |
| Q2G0Q3     | Lysine--tRNA ligase OS=Staphylococcus aureus (strain NCTC 8325 / PS 47) OX=93061 GN=lysS PE=3 SV=1 UPId=UP000008816 PPId=UP000008816                                                                                  |
| P48860     | 50S ribosomal protein L7/L12 OS=Staphylococcus aureus (strain NCTC 8325 / PS 47) OX=93061 GN=rpL PE=3 SV=2 UPId=UP000008816 PPId=UP000008816                                                                          |
| Q2G2A3     | Dihydrolipoyl dehydrogenase OS=Staphylococcus aureus (strain NCTC 8325 / PS 47) OX=93061 GN=SAOUHSC_01043 PE=3 SV=1 UPId=UP000008816 PPId=UP000008816                                                                 |
| Q2FVT5     | Urocanate hydratase OS=Staphylococcus aureus (strain NCTC 8325 / PS 47) OX=93061 GN=hutU PE=3 SV=1 UPId=UP000008816 PPId=UP000008816                                                                                  |
| Q2FW30     | 30S ribosomal protein S13 OS=Staphylococcus aureus (strain NCTC 8325 / PS 47) OX=93061 GN=rpsM PE=1 SV=1 UPId=UP000008816 PPId=UP000008816                                                                            |
| Q2FZ27     | GTP-sensing transcriptional pleiotropic repressor CodY OS=Staphylococcus aureus (strain NCTC 8325 / PS 47) OX=93061 GN=codY PE=1 SV=1 UPId=UP000008816                                                                |

|  |                  |
|--|------------------|
|  | PPId=UP000008816 |
|--|------------------|

**sarR promoter**

| Accession | Description                                                                                                                                                                                 |
|-----------|---------------------------------------------------------------------------------------------------------------------------------------------------------------------------------------------|
| Q2G245    | Uncharacterized protein OS=Staphylococcus aureus (strain NCTC 8325 / PS 47) OX=93061 GN=SAOUHSC_01854 PE=4 SV=1 UPId=UP000008816 PPId=UP000008816                                           |
| Q2G2U9    | Transcriptional regulator SarA OS=Staphylococcus aureus (strain NCTC 8325 / PS 47) OX=93061 GN=sarA PE=1 SV=3 UPId=UP000008816 PPId=UP000008816                                             |
| Q2FZK7    | Bifunctional autolysin OS=Staphylococcus aureus (strain NCTC 8325 / PS 47) OX=93061 GN=atl PE=1 SV=1 UPId=UP000008816 PPId=UP000008816                                                      |
| Q2FZI6    | Bifunctional purine biosynthesis protein PurH OS=Staphylococcus aureus (strain NCTC 8325 / PS 47) OX=93061 GN=purH PE=3 SV=1 UPId=UP000008816 PPId=UP000008816                              |
| Q2G0N0    | Elongation factor Tu OS=Staphylococcus aureus (strain NCTC 8325 / PS 47) OX=93061 GN=tuf PE=3 SV=1 UPId=UP000008816 PPId=UP000008816                                                        |
| Q2FXM9    | Pyruvate kinase OS=Staphylococcus aureus (strain NCTC 8325 / PS 47) OX=93061 GN=pyk PE=3 SV=1 UPId=UP000008816 PPId=UP000008816                                                             |
| Q2FXZ2    | Chaperone protein DnaK OS=Staphylococcus aureus (strain NCTC 8325 / PS 47) OX=93061 GN=dnaK PE=3 SV=1 UPId=UP000008816 PPId=UP000008816                                                     |
| Q2FYF1    | Elastin-binding protein EbpS OS=Staphylococcus aureus (strain NCTC 8325 / PS 47) OX=93061 GN=ebpS PE=1 SV=1 UPId=UP000008816 PPId=UP000008816                                               |
| Q2FXX0    | Acetyl-CoA carboxylase, biotin carboxyl carrier protein, putative OS=Staphylococcus aureus (strain NCTC 8325 / PS 47) OX=93061 GN=SAOUHSC_01710 PE=4 SV=1 UPId=UP000008816 PPId=UP000008816 |
| Q2G1D8    | Formate acetyltransferase OS=Staphylococcus aureus (strain NCTC 8325 / PS 47) OX=93061 GN=pfIB PE=3 SV=1 UPId=UP000008816 PPId=UP000008816                                                  |
| Q2FW31    | 30S ribosomal protein S11 OS=Staphylococcus aureus (strain NCTC 8325 / PS 47) OX=93061 GN=rpsK PE=1 SV=1 UPId=UP000008816 PPId=UP000008816                                                  |
| Q2FZ25    | 30S ribosomal protein S2 OS=Staphylococcus aureus (strain NCTC 8325 / PS 47) OX=93061 GN=rpsB PE=1 SV=2 UPId=UP000008816 PPId=UP000008816                                                   |
| Q9FOR1    | HTH-type transcriptional regulator SarR OS=Staphylococcus aureus (strain NCTC 8325 / PS 47) OX=93061 GN=sarR PE=1 SV=3 UPId=UP000008816 PPId=UP000008816                                    |
| Q2FXM1    | Usp domain-containing protein OS=Staphylococcus aureus (strain NCTC 8325 / PS 47) OX=93061 GN=SAOUHSC_01814 PE=3 SV=1 UPId=UP000008816 PPId=UP000008816                                     |
| Q2G0P0    | 50S ribosomal protein L1 OS=Staphylococcus aureus (strain NCTC 8325 / PS 47) OX=93061 GN=rplA PE=3 SV=1 UPId=UP000008816 PPId=UP000008816                                                   |
| Q2FXY6    | 30S ribosomal protein S20 OS=Staphylococcus aureus (strain NCTC 8325 / PS 47) OX=93061 GN=rpsT PE=1 SV=1 UPId=UP000008816 PPId=UP000008816                                                  |
| Q2FW10    | 30S ribosomal protein S19 OS=Staphylococcus aureus (strain NCTC 8325 / PS 47) OX=93061 GN=rpsS PE=1 SV=1 UPId=UP000008816 PPId=UP000008816                                                  |
| Q2FZJ6    | Bifunctional protein Fold OS=Staphylococcus aureus (strain NCTC 8325 / PS 47) OX=93061                                                                                                      |



|            |                                                                                                                                                                                                          |
|------------|----------------------------------------------------------------------------------------------------------------------------------------------------------------------------------------------------------|
|            | GN=foI D PE=3 SV=1 UPId=UP000008816 PPId=UP000008816                                                                                                                                                     |
| Q5HK31     | Penicillin-binding protein 2 OS=Staphylococcus epidermidis (strain ATCC 35984 / RP62A) OX=176279 GN=mecA PE=3 SV=1 UPId=UP000000531 PPId=UP000008816                                                     |
| Q2FXH8     | Uncharacterized protein OS=Staphylococcus aureus (strain NCTC 8325 / PS 47) OX=93061 GN=SAOUHSC_01869 PE=4 SV=1 UPId=UP000008816 PPId=UP000008816                                                        |
| Q2FZ89     | Cell division protein FtsZ OS=Staphylococcus aureus (strain NCTC 8325 / PS 47) OX=93061 GN=ftsZ PE=1 SV=1 UPId=UP000008816 PPId=UP000008816                                                              |
| Q2FWE6     | Uracil phosphoribosyltransferase OS=Staphylococcus aureus (strain NCTC 8325 / PS 47) OX=93061 GN=upp PE=3 SV=1 UPId=UP000008816 PPId=UP000008816                                                         |
| Q2G170     | 5'-nucleotidase, lipoprotein e(P4) family OS=Staphylococcus aureus (strain NCTC 8325 / PS 47) OX=93061 GN=SAOUHSC_00284 PE=4 SV=1 UPId=UP000008816 PPId=UP000008816                                      |
| Q2G2A4     | Dihydrolipoamide acetyltransferase component of pyruvate dehydrogenase complex OS=Staphylococcus aureus (strain NCTC 8325 / PS 47) OX=93061 GN=SAOUHSC_01042 PE=3 SV=1 UPId=UP000008816 PPId=UP000008816 |
| P60430     | 50S ribosomal protein L2 OS=Staphylococcus aureus (strain NCTC 8325 / PS 47) OX=93061 GN=rplB PE=1 SV=1 UPId=UP000008816 PPId=UP000008816                                                                |
| Q2G0Z2     | Uncharacterized protein OS=Staphylococcus aureus (strain NCTC 8325 / PS 47) OX=93061 GN=SAOUHSC_00369 PE=4 SV=1 UPId=UP000008816 PPId=UP000008816                                                        |
| Q2G0B5     | Uncharacterized protein OS=Staphylococcus aureus (strain NCTC 8325 / PS 47) OX=93061 GN=SAOUHSC_00690 PE=4 SV=1 UPId=UP000008816 PPId=UP000008816                                                        |
| Q2FXP9     | Translation initiation factor IF-3 OS=Staphylococcus aureus (strain NCTC 8325 / PS 47) OX=93061 GN=infC PE=3 SV=1 UPId=UP000008816 PPId=UP000008816                                                      |
| Q2FZJ0     | Phosphoribosylformylglycinamide synthase subunit PurL OS=Staphylococcus aureus (strain NCTC 8325 / PS 47) OX=93061 GN=purL PE=3 SV=1 UPId=UP000008816 PPId=UP000008816                                   |
| Q2FWB9     | Deoxyribose-phosphate aldolase OS=Staphylococcus aureus (strain NCTC 8325 / PS 47) OX=93061 GN=deoC PE=3 SV=1 UPId=UP000008816 PPId=UP000008816                                                          |
| A0A380EK47 | General stress protein-like protein OS=Staphylococcus aureus OX=1280 GN=NCTC10702_02729 PE=3 SV=1 UPId=UP000254116 PPId=UP000008816                                                                      |
| Q2FZJ3     | Phosphoribosylaminoimidazole-succinocarboxamide synthase OS=Staphylococcus aureus (strain NCTC 8325 / PS 47) OX=93061 GN=purC PE=3 SV=1 UPId=UP000008816 PPId=UP000008816                                |
| A0A6B0CC41 | 30S ribosomal protein S7 OS=Staphylococcus aureus OX=1280 GN=rpsG PE=3 SV=1 UPId=UP000432849 PPId=UP000008816                                                                                            |
| P48860     | 50S ribosomal protein L7/L12 OS=Staphylococcus aureus (strain NCTC 8325 / PS 47) OX=93061 GN=rplL PE=3 SV=2 UPId=UP000008816 PPId=UP000008816                                                            |
| P02976     | Immunoglobulin G-binding protein A OS=Staphylococcus aureus (strain NCTC 8325 / PS 47) OX=93061 GN=spa PE=1 SV=3 UPId=UP000008816 PPId=UP000008816                                                       |
| Q2FWN4     | 60 kDa chaperonin OS=Staphylococcus aureus (strain NCTC 8325 / PS 47) OX=93061                                                                                                                           |



|            |                                                                                                                                                                                    |
|------------|------------------------------------------------------------------------------------------------------------------------------------------------------------------------------------|
|            | GN=groL PE=3 SV=1 UPId=UP000008816 PPId=UP000008816                                                                                                                                |
| Q2FYF9     | 30S ribosomal protein S1 OS=Staphylococcus aureus (strain NCTC 8325 / PS 47) OX=93061 GN=SAOUHSC_01493 PE=3 SV=1 UPId=UP000008816 PPId=UP000008816                                 |
| Q2FW12     | 30S ribosomal protein S3 OS=Staphylococcus aureus (strain NCTC 8325 / PS 47) OX=93061 GN=rpsC PE=1 SV=1 UPId=UP000008816 PPId=UP000008816                                          |
| A0A6H5DTD2 | DNA-directed RNA polymerase OS=Staphylococcus aureus OX=1280 GN=rpoB PE=4 SV=1 UPId=UP000445221 PPId=UP000008816                                                                   |
| A0A2X2M7W6 | ABC transporter substrate-binding protein OS=Staphylococcus aureus OX=1280 GN=psaA_2 PE=3 SV=1 UPId=UP000249913 PPId=UP000008816                                                   |
| Q2G296     | Formate--tetrahydrofolate ligase OS=Staphylococcus aureus (strain NCTC 8325 / PS 47) OX=93061 GN=fhs PE=3 SV=1 UPId=UP000008816 PPId=UP000008816                                   |
| Q2FYU7     | Catalase OS=Staphylococcus aureus (strain NCTC 8325 / PS 47) OX=93061 GN=kata PE=2 SV=2 UPId=UP000008816 PPId=UP000008816                                                          |
| Q2FZT4     | Uncharacterized protein SAOUHSC_00906 OS=Staphylococcus aureus (strain NCTC 8325 / PS 47) OX=93061 GN=SAOUHSC_00906 PE=3 SV=1 UPId=UP000008816 PPId=UP000008816                    |
| Q2FW20     | 30S ribosomal protein S8 OS=Staphylococcus aureus (strain NCTC 8325 / PS 47) OX=93061 GN=rpsH PE=1 SV=1 UPId=UP000008816 PPId=UP000008816                                          |
| Q2FVN6     | Uncharacterized protein OS=Staphylococcus aureus (strain NCTC 8325 / PS 47) OX=93061 GN=SAOUHSC_02666 PE=4 SV=1 UPId=UP000008816 PPId=UP000008816                                  |
| Q2G0B1     | HTH-type transcriptional regulator MgrA OS=Staphylococcus aureus (strain NCTC 8325 / PS 47) OX=93061 GN=mgrA PE=1 SV=3 UPId=UP000008816 PPId=UP000008816                           |
| Q2G028     | Enolase OS=Staphylococcus aureus (strain NCTC 8325 / PS 47) OX=93061 GN=eno PE=1 SV=1 UPId=UP000008816 PPId=UP000008816                                                            |
| Q2G1G5     | PTS system EIIBC component SAOUHSC_00158 OS=Staphylococcus aureus (strain NCTC 8325 / PS 47) OX=93061 GN=SAOUHSC_00158 PE=3 SV=1 UPId=UP000008816 PPId=UP000008816                 |
| A0A431ZSC5 | Cyclic pyranopterin monophosphate synthase OS=Staphylococcus pasteurii OX=45972 GN=moaC PE=3 SV=1 UPId=UP000273693 PPId=UP000008816                                                |
| Q2G2D8     | ABC transporter, substrate-binding protein, putative OS=Staphylococcus aureus (strain NCTC 8325 / PS 47) OX=93061 GN=SAOUHSC_00634 PE=3 SV=1 UPId=UP000008816 PPId=UP000008816     |
| A0A431ZM32 | Endolytic murein transglycosylase OS=Staphylococcus pasteurii OX=45972 GN=mltG PE=3 SV=1 UPId=UP000273693 PPId=UP000008816                                                         |
| Q2FY10     | Putative pyruvate, phosphate dikinase regulatory protein OS=Staphylococcus aureus (strain NCTC 8325 / PS 47) OX=93061 GN=SAOUHSC_01664 PE=3 SV=1 UPId=UP000008816 PPId=UP000008816 |
| Q2G224     | Deoxyribose-phosphate aldolase OS=Staphylococcus aureus (strain NCTC 8325 / PS 47) OX=93061 GN=deoC PE=3 SV=1 UPId=UP000008816 PPId=UP000008816                                    |

|            |                                                                                                                                                                         |
|------------|-------------------------------------------------------------------------------------------------------------------------------------------------------------------------|
| Q2FXZ7     | 30S ribosomal protein S21 OS=Staphylococcus aureus (strain NCTC 8325 / PS 47) OX=93061 GN=rpsU PE=1 SV=1 UPId=UP000008816 PPId=UP000008816                              |
| Q2G2G0     | DM13 domain-containing protein OS=Staphylococcus aureus (strain NCTC 8325 / PS 47) OX=93061 GN=SAOUHSC_00717 PE=4 SV=1 UPId=UP000008816 PPId=UP000008816                |
| A0A2X2M757 | 50S ribosomal protein L6 OS=Staphylococcus aureus OX=1280 GN=rplF_1 PE=4 SV=1 UPId=UP000249913 PPId=UP000008816                                                         |
| Q2G0Y7     | Inosine-5'-monophosphate dehydrogenase OS=Staphylococcus aureus (strain NCTC 8325 / PS 47) OX=93061 GN=guaB PE=3 SV=1 UPId=UP000008816 PPId=UP000008816                 |
| A0A380EDA2 | Polyribitolphosphotransferase OS=Staphylococcus aureus OX=1280 GN=tagF_1 PE=3 SV=1 UPId=UP000254116 PPId=UP000008816                                                    |
| Q2FWN9     | Uncharacterized leukocidin-like protein 2 OS=Staphylococcus aureus (strain NCTC 8325 / PS 47) OX=93061 GN=SAOUHSC_02243 PE=1 SV=1 UPId=UP000008816 PPId=UP000008816     |
| Q2FWX9     | 4,4'-diaponeurosporen-aldehyde dehydrogenase OS=Staphylococcus aureus (strain NCTC 8325 / PS 47) OX=93061 GN=aldH1 PE=1 SV=1 UPId=UP000008816 PPId=UP000008816          |
| Q2FZ23     | Elongation factor Ts OS=Staphylococcus aureus (strain NCTC 8325 / PS 47) OX=93061 GN=tsf PE=3 SV=1 UPId=UP000008816 PPId=UP000008816                                    |
| A0A2T4PZP2 | Cysteine synthase OS=Staphylococcus warneri OX=1292 GN=cysK PE=3 SV=1 UPId=UP000240717 PPId=UP000008816                                                                 |
| Q2FV67     | 1-pyrroline-5-carboxylate dehydrogenase OS=Staphylococcus aureus (strain NCTC 8325 / PS 47) OX=93061 GN=rocA PE=3 SV=1 UPId=UP000008816 PPId=UP000008816                |
| A0A2T4PYT6 | Glutamate ligase OS=Staphylococcus warneri OX=1292 GN=BU085_09705 PE=4 SV=1 UPId=UP000240717 PPId=UP000008816                                                           |
| Q2FZC2     | Fibrinogen-binding protein OS=Staphylococcus aureus (strain NCTC 8325 / PS 47) OX=93061 GN=SAOUHSC_01110 PE=4 SV=1 UPId=UP000008816 PPId=UP000008816                    |
| Q2G0F2     | Uncharacterized protein OS=Staphylococcus aureus (strain NCTC 8325 / PS 47) OX=93061 GN=SAOUHSC_00617 PE=4 SV=1 UPId=UP000008816 PPId=UP000008816                       |
| Q2FW30     | 30S ribosomal protein S13 OS=Staphylococcus aureus (strain NCTC 8325 / PS 47) OX=93061 GN=rpsM PE=1 SV=1 UPId=UP000008816 PPId=UP000008816                              |
| Q2FZ07     | Uncharacterized protein OS=Staphylococcus aureus (strain NCTC 8325 / PS 47) OX=93061 GN=SAOUHSC_01264 PE=4 SV=1 UPId=UP000008816 PPId=UP000008816                       |
| Q2FW08     | 50S ribosomal protein L23 OS=Staphylococcus aureus (strain NCTC 8325 / PS 47) OX=93061 GN=rplW PE=1 SV=1 UPId=UP000008816 PPId=UP000008816                              |
| A0A380DXF4 | Pyruvate oxidase OS=Staphylococcus aureus OX=1280 GN=poxB PE=3 SV=1 UPId=UP000255091 PPId=UP000008816                                                                   |
| Q2FZV7     | NADH dehydrogenase-like protein SAOUHSC_00878 OS=Staphylococcus aureus (strain NCTC 8325 / PS 47) OX=93061 GN=SAOUHSC_00878 PE=1 SV=1 UPId=UP000008816 PPId=UP000008816 |
| Q2FZJ9     | Probable quinol oxidase subunit 2 OS=Staphylococcus aureus (strain NCTC 8325 / PS 47)                                                                                   |

|            |                                                                                                                                                                                     |
|------------|-------------------------------------------------------------------------------------------------------------------------------------------------------------------------------------|
|            | OX=93061 GN=qoxA PE=3 SV=1 UPId=UP000008816 PPId=UP000008816                                                                                                                        |
| Q2FXQ6     | Trigger factor OS=Staphylococcus aureus (strain NCTC 8325 / PS 47) OX=93061 GN=tig PE=3 SV=1 UPId=UP000008816 PPId=UP000008816                                                      |
| Q5HNZ8     | 50S ribosomal protein L33 1 OS=Staphylococcus epidermidis (strain ATCC 35984 / RP62A) OX=176279 GN=rpmG1 PE=3 SV=1 UPId=UP000000531 PPId=UP000008816                                |
| Q2G273     | Urease accessory protein UreG OS=Staphylococcus aureus (strain NCTC 8325 / PS 47) OX=93061 GN=ureG PE=3 SV=1 UPId=UP000008816 PPId=UP000008816                                      |
| Q2FWW1     | MHC class II analog protein OS=Staphylococcus aureus (strain NCTC 8325 / PS 47) OX=93061 GN=SAOUHSC_02161 PE=4 SV=1 UPId=UP000008816 PPId=UP000008816                               |
| Q2FY42     | Biotin carboxyl carrier protein of acetyl-CoA carboxylase OS=Staphylococcus aureus (strain NCTC 8325 / PS 47) OX=93061 GN=SAOUHSC_01624 PE=4 SV=1 UPId=UP000008816 PPId=UP000008816 |
| Q2FZ45     | 30S ribosomal protein S16 OS=Staphylococcus aureus (strain NCTC 8325 / PS 47) OX=93061 GN=rpsP PE=1 SV=1 UPId=UP000008816 PPId=UP000008816                                          |
| Q2G1U6     | Regulatory protein Spx OS=Staphylococcus aureus (strain NCTC 8325 / PS 47) OX=93061 GN=spxA PE=3 SV=1 UPId=UP000008816 PPId=UP000008816                                             |
| Q2FV17     | Fructose-bisphosphate aldolase class 1 OS=Staphylococcus aureus (strain NCTC 8325 / PS 47) OX=93061 GN=fda PE=3 SV=1 UPId=UP000008816 PPId=UP000008816                              |
| Q2FZP9     | Putative phosphoesterase SAOUHSC_00951 OS=Staphylococcus aureus (strain NCTC 8325 / PS 47) OX=93061 GN=SAOUHSC_00951 PE=3 SV=1 UPId=UP000008816 PPId=UP000008816                    |
| Q2G111     | 30S ribosomal protein S18 OS=Staphylococcus aureus (strain NCTC 8325 / PS 47) OX=93061 GN=rpsR PE=1 SV=1 UPId=UP000008816 PPId=UP000008816                                          |
| Q2G0Z0     | YfiT domain-containing protein OS=Staphylococcus aureus (strain NCTC 8325 / PS 47) OX=93061 GN=SAOUHSC_00371 PE=3 SV=1 UPId=UP000008816 PPId=UP000008816                            |
| Q2FW07     | 50S ribosomal protein L4 OS=Staphylococcus aureus (strain NCTC 8325 / PS 47) OX=93061 GN=rpID PE=1 SV=1 UPId=UP000008816 PPId=UP000008816                                           |
| A0A6H3W178 | Elongation factor G OS=Staphylococcus aureus OX=1280 GN=fusA_2 PE=3 SV=1 UPId=UP000444022 PPId=UP000008816                                                                          |
| Q2FX90     | Uncharacterized protein OS=Staphylococcus aureus (strain NCTC 8325 / PS 47) OX=93061 GN=SAOUHSC_01987 PE=4 SV=1 UPId=UP000008816 PPId=UP000008816                                   |
| Q2FWZ8     | Bacterial non-heme ferritin OS=Staphylococcus aureus (strain NCTC 8325 / PS 47) OX=93061 GN=ftnA PE=1 SV=1 UPId=UP000008816 PPId=UP000008816                                        |
| Q2G2G6     | DUF4064 domain-containing protein OS=Staphylococcus aureus (strain NCTC 8325 / PS 47) OX=93061 GN=SAOUHSC_01050 PE=4 SV=1 UPId=UP000008816 PPId=UP000008816                         |
| Q2FY06     | GTPase Era OS=Staphylococcus aureus (strain NCTC 8325 / PS 47) OX=93061 GN=era PE=3 SV=2 UPId=UP000008816 PPId=UP000008816                                                          |
| Q2FYG7     | Nucleoside diphosphate kinase OS=Staphylococcus aureus (strain NCTC 8325 / PS 47) OX=93061 GN=ndk PE=3 SV=2 UPId=UP000008816 PPId=UP000008816                                       |

|            |                                                                                                                                |
|------------|--------------------------------------------------------------------------------------------------------------------------------|
| A0A2X2K2P2 | HTH-type transcriptional regulator sarS OS=Staphylococcus aureus OX=1280 GN=sarS_2 PE=4 SV=1 UPId=UP000249913 PPId=UP000008816 |
|------------|--------------------------------------------------------------------------------------------------------------------------------|

**Supplementary Table S4.** Sensitivity data

| Antibiotics         | USA300 JE2 MIC ( $\mu\text{g/ml}$ ) | NE1193 $\Delta\text{sarA}$ ( $\mu\text{g/ml}$ ) |
|---------------------|-------------------------------------|-------------------------------------------------|
| Daptomycin          | $\leq 0.5$                          | $\leq 0.5$                                      |
| Oxacillin + 2% NaCl | $\geq 4$                            | $\geq 4$                                        |
| Ampicillin          | 8                                   | 2                                               |
| Penicillin          | 8                                   | 1                                               |
| Vancomycin          | 1                                   | 1                                               |

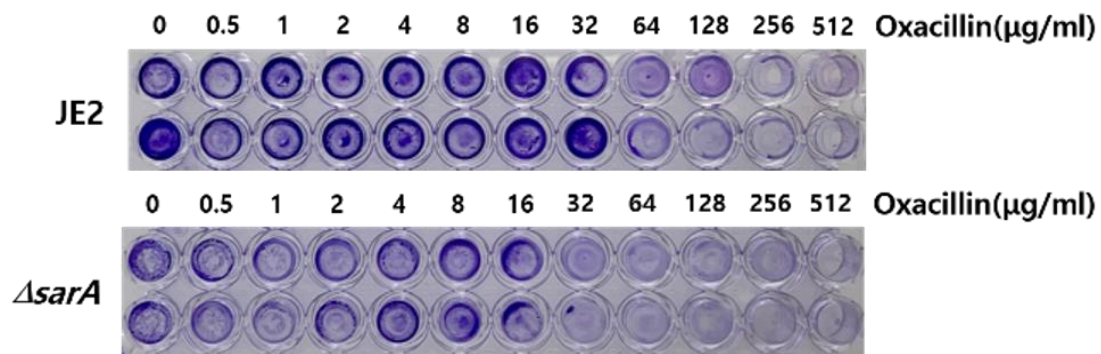

**Supplementary Figure S1.** Comparison of biofilm formation through crystal violet staining in 96-well plate.
